# Supplementary material
Source: PubMed Central journal article supplement (PMC4651156)
Supplement: gf492sup_10-1055-s-0032-1314942.pdf [file gf492sup_10-1055-s-0032-1314942.pdf]

# Digitale Vollfeldmammografie (FFDM) versus CMOS-Technologie versus Tomosynthese (DBT) – Welches System steigert die Qualität der Präparateradiografie?

Full Field Digital Mammography (FFDM) versus CMOS Technology versus Tomosynthesis (DBT) – Which System Increases the Quality of Intraoperative Imaging?

**Autoren** R. Schulz-Wendtland<sup>1</sup>, G. Dilbat<sup>2</sup>, M. Bani<sup>3</sup>, P. A. Fasching<sup>3</sup>, M. P. Lux<sup>3</sup>, E. Wenkel<sup>4</sup>, S. Schwab<sup>4</sup>, C. R. Loehberg<sup>5</sup>, S. M. Jud<sup>3</sup>, C. Rauh<sup>5</sup>, C. M. Bayer<sup>6</sup>, M. W. Beckmann<sup>7</sup>, M. Uder<sup>8</sup>, M. Meier-Meitingen<sup>4</sup>

**Institute** <sup>1</sup> Gynäkologische Radiologie, Radiologisches Institut des Universitätsklinikums Erlangen, Erlangen  
<sup>2</sup> Radiologie, Radiologie Roth, Roth  
<sup>3</sup> Department of Gynecology and Obstetrics, University Hospital Erlangen, Erlangen  
<sup>4</sup> Radiologisches Institut, Universitätsklinikum Erlangen, Erlangen  
<sup>5</sup> Dept. of OB/Gyn, University Hospital of Erlangen, Erlangen  
<sup>6</sup> Frauenklinik, Universitätsklinikum Erlangen, Erlangen  
<sup>7</sup> Direktor der Frauenklinik, Universitätsklinikum Erlangen, Erlangen  
<sup>8</sup> Direktor des Radiologischen Institutes, Universitätsklinikum Erlangen, Erlangen

**Tab. 1** Wesentliche technische Basiskennmerkmale der Systeme (System Nr. 1 „Inspiration™“ und System Nr. 2 „BioVision™“) zur Erstellung von Präparateradiografien – zusätzlich für die „Tomosynthese“ (System Nr. 3) die Möglichkeiten der Erstellung von Projektionsbildern/Cine-Mode durch die Nutzung eines Winkelbereiches von 50 Grad bei 25 Projektionen und einer Scandauer > 20 s, der Geometrie der gleichförmigen Abtastung und Rekonstruktion der gefilterten Rückprojektion.

|                                  | System Nr. 1<br>„Inspiration™“ | System Nr. 2<br>„BioVision™“                                                             | System Nr. 3<br>„Tomosynthese“ |
|----------------------------------|--------------------------------|------------------------------------------------------------------------------------------|--------------------------------|
| Hersteller                       | Siemens                        | Bioptics                                                                                 | Siemens                        |
| Anode                            | Mo, W                          | W                                                                                        | Mo, Rh                         |
| Filter                           | Mo, Rh                         | Beryllium                                                                                | Mo, Rh                         |
| Streustrahlungsraster            | linear                         | nein                                                                                     | linear                         |
| Konversionsmaterial              | Halbleiter<br>a-Se             | Photon Conversion Material: Gd2O2S: Tb<br>(Terbium doped Gadolinium Oxysulfide) Phosphor | Halbleiter<br>a-Se             |
| Ausleseprozess                   | Dünnschichttransistoren        | Progressive Line – Scan Auslese                                                          | Dünnschichttransistoren        |
| Pixelgröße                       | 85 µm                          | 50 µm                                                                                    | 85 µm                          |
| Ortsauflösung (Nyquist-Frequenz) | 8 Lp/mm                        | 12 Lp/mm                                                                                 | 8 Lp/mm                        |
| Feldgröße                        | 24 × 30 cm <sup>2</sup>        | 24 × 30 cm <sup>2</sup>                                                                  | 24 × 30 cm <sup>2</sup>        |

**Tab. 2** Sensitivität und Spezifität für die drei Systeme (System Nr. 1 „Inspiration™“; System Nr. 2 „BioVision™“ und System Nr. 3 „Tomosynthese“) ermittelt von 3 Befundern durch prospektive Beurteilung von jeweils 600 Präparateradiografien/Projektionsbildern (Cine-Mode) von 200 Patientinnen mit insgesamt 200 malignen Läsionen.

|                                                                          | Sensitivität (%)                         |                                        |                                           | Spezifität (%)                           |                                        |                                           |
|--------------------------------------------------------------------------|------------------------------------------|----------------------------------------|-------------------------------------------|------------------------------------------|----------------------------------------|-------------------------------------------|
|                                                                          | System Nr. 1<br>„Inspiration“<br>(85 µm) | System Nr. 2<br>„BioVision“<br>(50 µm) | System Nr. 3<br>„Tomosynthese“<br>(85 µm) | System Nr. 1<br>„Inspiration“<br>(85 µm) | System Nr. 2<br>„BioVision“<br>(50 µm) | System Nr. 3<br>„Tomosynthese“<br>(85 µm) |
| Vergrößerung<br>1,0: 1,0 (Nr. 1)<br>1,0: 1,0 (Nr. 2)<br>1,0: 1,0 (Nr. 3) |                                          |                                        |                                           |                                          |                                        |                                           |
| Befunder 1                                                               | 78,0                                     | 79,0                                   | 86,0                                      | 100,0                                    | 100,0                                  | 100,0                                     |
| Befunder 2                                                               | 79,0                                     | 78,0                                   | 87,0                                      | 100,0                                    | 100,0                                  | 100,0                                     |
| Befunder 3                                                               | 78,0                                     | 78,0                                   | 87,0                                      | 100,0                                    | 100,0                                  | 100,0                                     |
| Mittelwert                                                               | 78,3                                     | 78,3                                   | 86,6                                      | 100,0                                    | 100,0                                  | 100,0                                     |

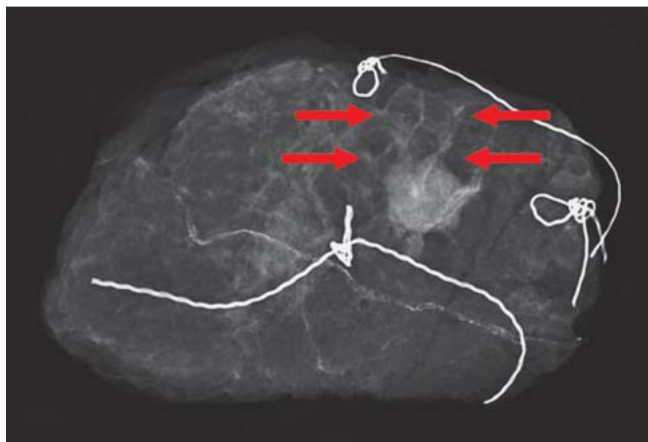

**Abb. 1** Präparateradiogramm; Inspiration™; Vergrößerung 1,0 × 1,0, invasives Mammakarzinom pT1cN0M0, Durchmesser des Tumorkernes 1,6 cm, Ausdehnung und Abgrenzung der Spikulae (Pfeile) vom umliegenden Gewebe nicht beurteilbar.

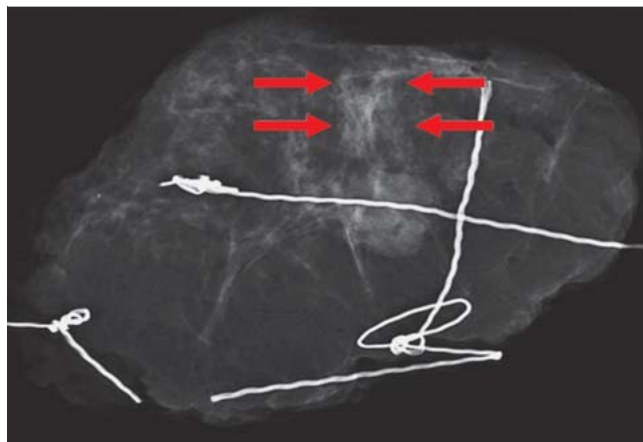

**Abb. 2** BioVision™, Vergrößerung 1,0 × 1,0, invasives Mammakarzinom pT1cN0M0, Durchmesser des Tumorkernes 1,6 cm, Ausdehnung und Abgrenzung der Spikulae (Pfeile) vom umliegenden Gewebe nicht beurteilbar.

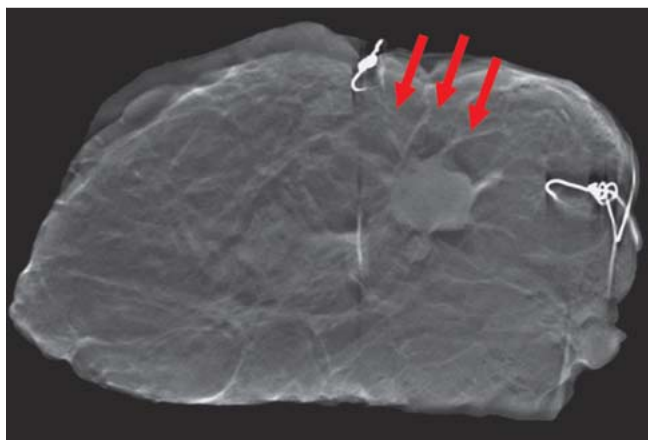

**Abb. 3** Tomosynthese, Bild 7 von 25; Vergrößerung 1,0 × 1,0, invasives Mammakarzinom pT1cN0M0, Durchmesser des Tumorkernes 1,6 cm, Ausdehnung und Abgrenzung der Spikulae (Pfeile) vom umliegenden Gewebe eindeutig beurteilbar (sowohl durch Bildgebung, als auch bestätigt durch die Histologie).

**Tab. 3** Detaillierte Darstellung der Resultate (R0/R1) (n = 200 Präparate) für die drei diagnostischen Systeme (System Nr. 1 „Inspiration™“; System Nr. 2 „BioVision™“, System Nr. 3 „Tomosynthese“) und dem endgültigen histologischen Ergebnis.

| n = 200                     |             |              |                           |
|-----------------------------|-------------|--------------|---------------------------|
| diagnostisch, histologisch  | R0: n = 156 |              |                           |
| diagnostisch „Inspiration™“ | R1: n = 44  |              |                           |
| diagnostisch „BioVision™“   | R1: n = 44  | histologisch | R1: n = 22/<br>R0: n = 22 |
| diagnostisch „Tomosynthese“ | R1: n = 28  |              |                           |
